# Supplementary material
Source: publisher figshare collection journal article supplement (https://acs.figshare.com/ndownloader/files/3823432)
Supplement: Supplementary file 1 [file 3823432]

# CIF file for compound 5d?

data_mgrav3052
_audit_creation_date              2014-01-27
_audit_creation_method
;
Olex2 1.2-beta
(compiled 2013.12.10 svn.r2850 for OlexSys, GUI svn.r4736)
;
_shelxl_version_number            2013-4
_publ_contact_author_address      ?
_publ_contact_author_email        ?
_publ_contact_author_name         ''
_publ_contact_author_phone        ?
_publ_section_references
;
Dolomanov, O.V., Bourhis, L.J., Gildea, R.J, Howard, J.A.K. & Puschmann, H.
 (2009), J. Appl. Cryst. 42, 339-341.


Palatinus, L. & Chapuis, G. (2007). J. Appl. Cryst., 40, 786-790;
Palatinus, L. & van der Lee, A. (2008). J. Appl. Cryst. 41, 975-984;
Palatinus, L., Prathapa, S. J. & van Smaalen, S. (2012). J. Appl. Cryst. 45,
 575-580
Sheldrick, G.M. (2008). Acta Cryst. A64, 112-122
;
_chemical_name_common             ?
_chemical_name_systematic
;
 ?
;
_chemical_formula_moiety          'C16 H16 Cl N3 O4'
_chemical_formula_sum             'C16 H16 Cl N3 O4'
_chemical_formula_weight          349.77
_chemical_melting_point           ?
loop_
  _atom_type_symbol
  _atom_type_description
  _atom_type_scat_dispersion_real
  _atom_type_scat_dispersion_imag
  _atom_type_scat_source
 'C' 'C' 0.0033 0.0016 'International Tables Vol C Tables 4.2.6.8 and 6.1.1.4'
 'H' 'H' 0.0000 0.0000 'International Tables Vol C Tables 4.2.6.8 and 6.1.1.4'
 'Cl' 'Cl' 0.1484 0.1585 'International Tables Vol C Tables 4.2.6.8 and 6.1.1.4'
 'N' 'N' 0.0061 0.0033 'International Tables Vol C Tables 4.2.6.8 and 6.1.1.4'
 'O' 'O' 0.0106 0.0060 'International Tables Vol C Tables 4.2.6.8 and 6.1.1.4'

_shelx_space_group_comment
;
The symmetry employed for this shelxl refinement is uniquely defined
by the following loop, which should always be used as a source of
symmetry information in preference to the above space-group names.
They are only intended as comments.
;
_space_group_crystal_system       'triclinic'
_space_group_IT_number            2
_space_group_name_H-M_alt         'P -1'
_space_group_name_Hall            '-P 1'
loop_
  _space_group_symop_operation_xyz
 'x, y, z'
 '-x, -y, -z'

_cell_length_a                    8.9484(19)
_cell_length_b                    10.234(2)
_cell_length_c                    11.213(2)
_cell_angle_alpha                 116.439(2)
_cell_angle_beta                  93.526(3)
_cell_angle_gamma                 110.517(2)
_cell_volume                      831.6(3)
_cell_formula_units_Z             2
_cell_measurement_reflns_used     3575
_cell_measurement_temperature     298
_cell_measurement_theta_max       26.605
_cell_measurement_theta_min       2.299
_shelx_estimated_absorpt_T_max    0.922
_shelx_estimated_absorpt_T_min    0.857
_exptl_absorpt_coefficient_mu     0.255
_exptl_absorpt_correction_T_max   0.7462
_exptl_absorpt_correction_T_min   0.6937
_exptl_absorpt_correction_type    multi-scan
_exptl_absorpt_process_details
;
SADABS-2012/1 (Bruker,2012) was used for absorption correction.
wR2(int) was 0.0608 before and 0.0390 after correction.
The Ratio of minimum to maximum transmission is 0.9296.
The \l/2 correction factor is 0.0015.
;
_exptl_crystal_colour             'colourless'
_exptl_crystal_density_diffrn     1.397
_exptl_crystal_density_meas       ?
_exptl_crystal_density_method     ?
_exptl_crystal_description        prism
_exptl_crystal_F_000              364
_exptl_crystal_recrystallization_method
'The material was recrystallised from a mixture of DCM, hexanes and ethanol'
_exptl_crystal_size_max           0.626
_exptl_crystal_size_mid           0.557
_exptl_crystal_size_min           0.324
_exptl_special_details
;
 ?
;
_exptl_transmission_factor_max    ?
_exptl_transmission_factor_min    ?
_diffrn_reflns_av_R_equivalents   0.0327
_diffrn_reflns_av_unetI/netI      0.0375
_diffrn_reflns_Laue_measured_fraction_full 1.000
_diffrn_reflns_Laue_measured_fraction_max 0.987
_diffrn_reflns_limit_h_max        12
_diffrn_reflns_limit_h_min        -12
_diffrn_reflns_limit_k_max        14
_diffrn_reflns_limit_k_min        -14
_diffrn_reflns_limit_l_max        16
_diffrn_reflns_limit_l_min        -16
_diffrn_reflns_number             13534
_diffrn_reflns_point_group_measured_fraction_full 1.000
_diffrn_reflns_point_group_measured_fraction_max 0.987
_diffrn_reflns_theta_full         26.000
_diffrn_reflns_theta_max          31.037
_diffrn_reflns_theta_min          2.100
_diffrn_ambient_temperature       298
_diffrn_detector_area_resol_mean  512
_diffrn_measured_fraction_theta_full 1.000
_diffrn_measured_fraction_theta_max 0.987
_diffrn_measurement_device_type   'Bruker APEX-II'
_diffrn_measurement_method        '\f and \w scans'
_diffrn_radiation_monochromator   graphite
_diffrn_radiation_type            MoK\a
_diffrn_radiation_wavelength      0.71073
_diffrn_source                    'fine-focus sealed tube'
_diffrn_special_details           ?
_diffrn_standards_number          0
_reflns_Friedel_coverage          0.000
_reflns_Friedel_fraction_full     .
_reflns_Friedel_fraction_max      .
_reflns_number_gt                 2990
_reflns_number_total              5242
_reflns_special_details
;
 Reflections were merged by SHELXL according to the crystal
 class for the calculation of statistics and refinement.
 
 _reflns_Friedel_fraction is defined as the number of unique
 Friedel pairs measured divided by the number that would be
 possible theoretically, ignoring centric projections and
 systematic absences.
;
_reflns_threshold_expression      'I > 2\s(I)'
_computing_cell_refinement        'SAINT v8.32B (Bruker, 2013)'
_computing_data_collection        'APEX2 v2013.6-2 (Bruker, 2013)'
_computing_data_reduction         'SAINT v8.32B (Bruker, 2013)'
_computing_molecular_graphics     'Olex2 (Dolomanov et al., 2009)'
_computing_publication_material   'Olex2 (Dolomanov et al., 2009)'
_computing_structure_refinement   'ShelXL (Sheldrick, 2008)'
_computing_structure_solution
;
Superflip (Palatinus & Chapuis, 2007;Palatinus & van der Lee, 2008;
Palatinus et al., 2012)
;
_refine_diff_density_max          0.294
_refine_diff_density_min          -0.429
_refine_diff_density_rms          0.049
_refine_ls_extinction_coef        .
_refine_ls_extinction_method      none
_refine_ls_goodness_of_fit_ref    1.048
_refine_ls_hydrogen_treatment     mixed
_refine_ls_matrix_type            full
_refine_ls_number_parameters      265
_refine_ls_number_reflns          5242
_refine_ls_number_restraints      20
_refine_ls_R_factor_all           0.1047
_refine_ls_R_factor_gt            0.0618
_refine_ls_restrained_S_all       1.046
_refine_ls_shift/su_max           0.007
_refine_ls_shift/su_mean          0.000
_refine_ls_structure_factor_coef  Fsqd
_refine_ls_weighting_details
'w=1/[\s^2^(Fo^2^)+(0.0596P)^2^+0.3437P] where P=(Fo^2^+2Fc^2^)/3'
_refine_ls_weighting_scheme       calc
_refine_ls_wR_factor_gt           0.1429
_refine_ls_wR_factor_ref          0.1714
_refine_special_details
;
 ?
;
_olex2_refinement_description
;
1. Fixed Uiso
 At 1.5 times of:
  All C(H,H,H) groups
2. Restrained distances
 C16-H16B
 0.995 with sigma of 0.02
 C9-H9
 0.985 with sigma of 0.02
 C3-H3
 0.999 with sigma of 0.02
 C5-H5A = C5-H5B
 0.985 with sigma of 0.02
 C6-H6A = C6-H6B
 0.985 with sigma of 0.02
 C16-H16B \\sim C16-H16C \\sim C16-H16A
 with sigma of 0.005
 H16C-H16B \\sim H16C-H16A \\sim H16B-H16A
 with sigma of 0.005
 C12-H12 \\sim C11-H11 \\sim C10-H10 \\sim C9-H9
 with sigma of 0.005
 C5-H5A \\sim C5-H5B
 with sigma of 0.005
3. Uiso/Uaniso restraints and constraints
Uiso(H16A) = Uiso(H16B) = Uiso(H16C)
Uiso(H9) = Uiso(H10) = Uiso(H11) = Uiso(H12)
4.a Idealised Me refined as rotating group:
 C14(H14A,H14B,H14C)
;
_atom_sites_solution_hydrogens    mixed
_atom_sites_solution_primary      iterative
_atom_sites_solution_secondary    ?
loop_
  _atom_site_label
  _atom_site_type_symbol
  _atom_site_fract_x
  _atom_site_fract_y
  _atom_site_fract_z
  _atom_site_U_iso_or_equiv
  _atom_site_adp_type
  _atom_site_occupancy
  _atom_site_site_symmetry_order
  _atom_site_calc_flag
  _atom_site_refinement_flags_posn
  _atom_site_refinement_flags_adp
  _atom_site_refinement_flags_occupancy
  _atom_site_disorder_assembly
  _atom_site_disorder_group
 Cl1 Cl 0.27068(14) 0.06633(9) 0.50572(9) 0.1059(4) Uani 1 1 d . . . . .
 O3 O 0.52835(17) 0.35194(19) 0.84649(18) 0.0592(4) Uani 1 1 d . . . . .
 O2 O 0.1638(2) 0.2761(3) 1.06816(19) 0.0844(6) Uani 1 1 d . . . . .
 O4 O 0.3604(2) 0.1519(2) 0.8728(2) 0.0761(5) Uani 1 1 d . . . . .
 O1 O -0.09504(19) 0.1734(2) 0.94751(18) 0.0724(5) Uani 1 1 d . . . . .
 N2 N 0.0979(2) 0.3810(2) 0.72647(19) 0.0548(5) Uani 1 1 d . . . . .
 N1 N 0.23837(19) 0.3600(2) 0.73168(16) 0.0422(4) Uani 1 1 d . . . . .
 N3 N 0.0216(2) 0.3392(3) 0.80799(19) 0.0560(5) Uani 1 1 d . . . . .
 C10 C 0.4443(4) 0.8198(3) 0.7409(3) 0.0698(7) Uani 1 1 d . . . . .
 C3 C 0.3428(3) 0.3865(3) 0.6397(2) 0.0454(4) Uani 1 1 d D . . . .
 C6 C 0.1478(4) 0.3512(4) 0.3936(3) 0.0756(8) Uani 1 1 d D . . . .
 C12 C 0.2578(4) 0.6529(4) 0.5190(3) 0.0716(7) Uani 1 1 d . . . . .
 C7 C 0.2516(3) 0.5132(3) 0.5176(2) 0.0537(5) Uani 1 1 d . . . . .
 C5 C 0.1244(4) 0.2095(4) 0.4149(3) 0.0815(8) Uani 1 1 d D . . . .
 C8 C 0.3459(2) 0.5320(2) 0.6315(2) 0.0430(4) Uani 1 1 d . . . . .
 C2 C 0.2515(2) 0.3030(2) 0.81885(19) 0.0404(4) Uani 1 1 d . . . . .
 C9 C 0.4428(3) 0.6848(3) 0.7424(2) 0.0552(5) Uani 1 1 d D . . . .
 C1 C 0.1126(2) 0.2906(3) 0.8663(2) 0.0447(4) Uani 1 1 d . . . . .
 C4 C 0.2836(4) 0.2398(3) 0.4965(3) 0.0657(7) Uani 1 1 d . . . . .
 C16 C 0.6633(3) 0.3073(4) 0.8606(4) 0.0820(9) Uani 1 1 d D . . . .
 C13 C 0.0664(3) 0.2465(3) 0.9723(2) 0.0511(5) Uani 1 1 d . . . . .
 C15 C 0.3838(3) 0.2583(3) 0.8486(2) 0.0470(5) Uani 1 1 d . . . . .
 C14 C -0.1548(4) 0.1328(5) 1.0496(4) 0.1046(12) Uani 1 1 d . . . . .
 H14A H -0.2727 0.0723 1.0184 0.157 Uiso 1 1 calc GR . . . .
 H14B H -0.1268 0.2299 1.1356 0.157 Uiso 1 1 calc GR . . . .
 H14C H -0.1046 0.0694 1.0623 0.157 Uiso 1 1 calc GR . . . .
 C11 C 0.3507(4) 0.8019(4) 0.6291(4) 0.0787(8) Uani 1 1 d . . . . .
 H16A H 0.636(4) 0.1998(18) 0.7865(18) 0.102(6) Uiso 1 1 d . . . . .
 H16B H 0.753(3) 0.386(2) 0.851(2) 0.102(6) Uiso 1 1 d D . . . .
 H16C H 0.691(3) 0.316(3) 0.9491(17) 0.102(6) Uiso 1 1 d . . . . .
 H9 H 0.507(3) 0.693(4) 0.819(2) 0.091(5) Uiso 1 1 d D . . . .
 H12 H 0.186(3) 0.641(4) 0.443(2) 0.091(5) Uiso 1 1 d . . . . .
 H10 H 0.510(3) 0.927(2) 0.817(2) 0.091(5) Uiso 1 1 d . . . . .
 H11 H 0.355(4) 0.898(2) 0.630(3) 0.091(5) Uiso 1 1 d . . . . .
 H4 H 0.371(3) 0.263(3) 0.451(3) 0.073(7) Uiso 1 1 d . . . . .
 H3 H 0.455(2) 0.413(3) 0.688(2) 0.055(6) Uiso 1 1 d D . . . .
 H5A H 0.040(3) 0.195(3) 0.467(2) 0.076(8) Uiso 1 1 d D . . . .
 H6A H 0.203(3) 0.347(3) 0.322(2) 0.077(8) Uiso 1 1 d D . . . .
 H5B H 0.094(4) 0.111(3) 0.325(2) 0.125(12) Uiso 1 1 d D . . . .
 H6B H 0.039(3) 0.351(4) 0.366(3) 0.102(11) Uiso 1 1 d D . . . .

loop_
  _atom_site_aniso_label
  _atom_site_aniso_U_11
  _atom_site_aniso_U_22
  _atom_site_aniso_U_33
  _atom_site_aniso_U_23
  _atom_site_aniso_U_13
  _atom_site_aniso_U_12
 Cl1 0.1779(10) 0.0643(4) 0.1038(6) 0.0504(4) 0.0784(6) 0.0629(5)
 O3 0.0397(7) 0.0643(10) 0.0892(12) 0.0457(9) 0.0197(8) 0.0281(7)
 O2 0.0575(10) 0.1484(19) 0.0723(11) 0.0803(13) 0.0204(9) 0.0356(11)
 O4 0.0803(12) 0.0885(13) 0.1136(15) 0.0782(12) 0.0440(11) 0.0524(11)
 O1 0.0456(9) 0.1124(14) 0.0664(10) 0.0629(11) 0.0184(7) 0.0162(9)
 N2 0.0462(9) 0.0893(14) 0.0612(11) 0.0526(11) 0.0267(8) 0.0407(10)
 N1 0.0391(8) 0.0563(10) 0.0480(9) 0.0348(8) 0.0193(7) 0.0247(7)
 N3 0.0433(9) 0.0923(14) 0.0600(11) 0.0524(11) 0.0258(8) 0.0366(10)
 C10 0.0805(18) 0.0571(14) 0.0805(18) 0.0368(14) 0.0330(15) 0.0329(14)
 C3 0.0479(11) 0.0560(12) 0.0513(11) 0.0359(10) 0.0264(9) 0.0275(10)
 C6 0.0686(17) 0.101(2) 0.0526(14) 0.0405(15) 0.0114(13) 0.0284(16)
 C12 0.0762(17) 0.107(2) 0.0760(17) 0.0669(18) 0.0303(14) 0.0555(17)
 C7 0.0514(12) 0.0762(15) 0.0520(12) 0.0420(12) 0.0217(10) 0.0317(11)
 C5 0.082(2) 0.0743(18) 0.0524(15) 0.0206(14) 0.0180(14) 0.0100(15)
 C8 0.0447(10) 0.0550(11) 0.0452(10) 0.0325(9) 0.0216(8) 0.0262(9)
 C2 0.0388(9) 0.0473(10) 0.0436(10) 0.0273(9) 0.0149(8) 0.0203(8)
 C9 0.0589(13) 0.0626(14) 0.0558(13) 0.0352(11) 0.0218(11) 0.0292(11)
 C1 0.0395(10) 0.0606(12) 0.0433(10) 0.0322(9) 0.0154(8) 0.0216(9)
 C4 0.0897(18) 0.0582(14) 0.0651(15) 0.0370(12) 0.0446(14) 0.0356(13)
 C16 0.0492(14) 0.088(2) 0.117(2) 0.0460(18) 0.0186(15) 0.0443(15)
 C13 0.0456(11) 0.0706(14) 0.0489(11) 0.0383(11) 0.0202(9) 0.0246(10)
 C15 0.0478(11) 0.0553(12) 0.0539(11) 0.0339(10) 0.0195(9) 0.0286(10)
 C14 0.0621(17) 0.172(3) 0.099(2) 0.103(3) 0.0326(16) 0.0206(19)
 C11 0.097(2) 0.083(2) 0.102(2) 0.0657(19) 0.0449(18) 0.0569(18)

_geom_special_details
;
 All esds (except the esd in the dihedral angle between two l.s. planes)
 are estimated using the full covariance matrix.  The cell esds are taken
 into account individually in the estimation of esds in distances, angles
 and torsion angles; correlations between esds in cell parameters are only
 used when they are defined by crystal symmetry.  An approximate (isotropic)
 treatment of cell esds is used for estimating esds involving l.s. planes.
;
loop_
  _geom_bond_atom_site_label_1
  _geom_bond_atom_site_label_2
  _geom_bond_distance
  _geom_bond_site_symmetry_2
  _geom_bond_publ_flag
 Cl1 C4 1.788(2) . ?
 O3 C16 1.456(3) . ?
 O3 C15 1.321(2) . ?
 O2 C13 1.190(3) . ?
 O4 C15 1.189(2) . ?
 O1 C13 1.316(3) . ?
 O1 C14 1.454(3) . ?
 N2 N1 1.350(2) . ?
 N2 N3 1.305(2) . ?
 N1 C3 1.484(2) . ?
 N1 C2 1.360(2) . ?
 N3 C1 1.359(2) . ?
 C10 C9 1.385(3) . ?
 C10 C11 1.365(4) . ?
 C10 H10 0.963(13) . ?
 C3 C8 1.523(3) . ?
 C3 C4 1.517(3) . ?
 C3 H3 0.998(15) . ?
 C6 C7 1.501(4) . ?
 C6 C5 1.519(5) . ?
 C6 H6A 0.958(17) . ?
 C6 H6B 0.995(18) . ?
 C12 C7 1.404(4) . ?
 C12 C11 1.360(4) . ?
 C12 H12 0.963(12) . ?
 C7 C8 1.384(3) . ?
 C5 C4 1.496(4) . ?
 C5 H5A 0.989(12) . ?
 C5 H5B 0.989(12) . ?
 C8 C9 1.389(3) . ?
 C2 C1 1.370(2) . ?
 C2 C15 1.480(3) . ?
 C9 H9 0.964(12) . ?
 C1 C13 1.481(3) . ?
 C4 H4 0.98(3) . ?
 C16 H16A 0.966(13) . ?
 C16 H16B 0.967(13) . ?
 C16 H16C 0.966(13) . ?
 C14 H14A 0.9600 . ?
 C14 H14B 0.9600 . ?
 C14 H14C 0.9600 . ?
 C11 H11 0.963(12) . ?

loop_
  _geom_angle_atom_site_label_1
  _geom_angle_atom_site_label_2
  _geom_angle_atom_site_label_3
  _geom_angle
  _geom_angle_site_symmetry_1
  _geom_angle_site_symmetry_3
  _geom_angle_publ_flag
 C15 O3 C16 115.86(19) . . ?
 C13 O1 C14 115.96(19) . . ?
 N3 N2 N1 108.05(15) . . ?
 N2 N1 C3 119.22(14) . . ?
 N2 N1 C2 110.02(14) . . ?
 C2 N1 C3 130.54(15) . . ?
 N2 N3 C1 108.61(15) . . ?
 C9 C10 H10 121.6(19) . . ?
 C11 C10 C9 119.6(3) . . ?
 C11 C10 H10 118.8(18) . . ?
 N1 C3 C8 109.04(15) . . ?
 N1 C3 C4 112.39(17) . . ?
 N1 C3 H3 104.1(13) . . ?
 C8 C3 H3 109.0(13) . . ?
 C4 C3 C8 110.49(17) . . ?
 C4 C3 H3 111.5(13) . . ?
 C7 C6 C5 114.5(2) . . ?
 C7 C6 H6A 105.4(17) . . ?
 C7 C6 H6B 107.1(19) . . ?
 C5 C6 H6A 110.6(17) . . ?
 C5 C6 H6B 110.9(19) . . ?
 H6A C6 H6B 108(2) . . ?
 C7 C12 H12 118.2(18) . . ?
 C11 C12 C7 121.4(2) . . ?
 C11 C12 H12 120.1(18) . . ?
 C12 C7 C6 119.6(2) . . ?
 C8 C7 C6 122.6(2) . . ?
 C8 C7 C12 117.8(2) . . ?
 C6 C5 H5A 110.9(16) . . ?
 C6 C5 H5B 110(2) . . ?
 C4 C5 C6 109.7(2) . . ?
 C4 C5 H5A 108.0(16) . . ?
 C4 C5 H5B 107(2) . . ?
 H5A C5 H5B 111(3) . . ?
 C7 C8 C3 121.02(19) . . ?
 C7 C8 C9 120.36(19) . . ?
 C9 C8 C3 118.60(18) . . ?
 N1 C2 C1 104.41(15) . . ?
 N1 C2 C15 126.76(16) . . ?
 C1 C2 C15 128.77(17) . . ?
 C10 C9 C8 120.3(2) . . ?
 C10 C9 H9 122.0(18) . . ?
 C8 C9 H9 117.7(18) . . ?
 N3 C1 C2 108.90(16) . . ?
 N3 C1 C13 122.26(16) . . ?
 C2 C1 C13 128.65(17) . . ?
 Cl1 C4 H4 106.5(15) . . ?
 C3 C4 Cl1 110.78(17) . . ?
 C3 C4 H4 105.3(16) . . ?
 C5 C4 Cl1 111.6(2) . . ?
 C5 C4 C3 112.8(2) . . ?
 C5 C4 H4 109.5(15) . . ?
 O3 C16 H16A 109.9(19) . . ?
 O3 C16 H16B 102.0(19) . . ?
 O3 C16 H16C 112(2) . . ?
 H16A C16 H16B 110.7(11) . . ?
 H16A C16 H16C 110.9(11) . . ?
 H16B C16 H16C 110.8(11) . . ?
 O2 C13 O1 124.90(19) . . ?
 O2 C13 C1 123.87(19) . . ?
 O1 C13 C1 111.22(17) . . ?
 O3 C15 C2 111.70(16) . . ?
 O4 C15 O3 125.23(19) . . ?
 O4 C15 C2 123.07(19) . . ?
 O1 C14 H14A 109.5 . . ?
 O1 C14 H14B 109.5 . . ?
 O1 C14 H14C 109.5 . . ?
 H14A C14 H14B 109.5 . . ?
 H14A C14 H14C 109.5 . . ?
 H14B C14 H14C 109.5 . . ?
 C10 C11 H11 118.0(18) . . ?
 C12 C11 C10 120.6(2) . . ?
 C12 C11 H11 121.4(18) . . ?

loop_
  _geom_torsion_atom_site_label_1
  _geom_torsion_atom_site_label_2
  _geom_torsion_atom_site_label_3
  _geom_torsion_atom_site_label_4
  _geom_torsion
  _geom_torsion_site_symmetry_1
  _geom_torsion_site_symmetry_2
  _geom_torsion_site_symmetry_3
  _geom_torsion_site_symmetry_4
  _geom_torsion_publ_flag
 N2 N1 C3 C8 39.3(2) . . . . ?
 N2 N1 C3 C4 -83.6(2) . . . . ?
 N2 N1 C2 C1 0.0(2) . . . . ?
 N2 N1 C2 C15 177.40(19) . . . . ?
 N2 N3 C1 C2 0.1(3) . . . . ?
 N2 N3 C1 C13 175.4(2) . . . . ?
 N1 N2 N3 C1 -0.1(3) . . . . ?
 N1 C3 C8 C7 -102.5(2) . . . . ?
 N1 C3 C8 C9 76.0(2) . . . . ?
 N1 C3 C4 Cl1 -55.4(2) . . . . ?
 N1 C3 C4 C5 70.5(2) . . . . ?
 N1 C2 C1 N3 0.0(2) . . . . ?
 N1 C2 C1 C13 -175.0(2) . . . . ?
 N1 C2 C15 O3 34.5(3) . . . . ?
 N1 C2 C15 O4 -146.4(2) . . . . ?
 N3 N2 N1 C3 175.25(18) . . . . ?
 N3 N2 N1 C2 0.1(2) . . . . ?
 N3 C1 C13 O2 -143.0(3) . . . . ?
 N3 C1 C13 O1 35.9(3) . . . . ?
 C3 N1 C2 C1 -174.5(2) . . . . ?
 C3 N1 C2 C15 3.0(3) . . . . ?
 C3 C8 C9 C10 -177.69(19) . . . . ?
 C6 C7 C8 C3 -3.0(3) . . . . ?
 C6 C7 C8 C9 178.5(2) . . . . ?
 C6 C5 C4 Cl1 -172.42(18) . . . . ?
 C6 C5 C4 C3 62.1(3) . . . . ?
 C12 C7 C8 C3 178.44(19) . . . . ?
 C12 C7 C8 C9 0.0(3) . . . . ?
 C7 C6 C5 C4 -40.9(3) . . . . ?
 C7 C12 C11 C10 1.6(4) . . . . ?
 C7 C8 C9 C10 0.8(3) . . . . ?
 C5 C6 C7 C12 -168.6(2) . . . . ?
 C5 C6 C7 C8 12.8(4) . . . . ?
 C8 C3 C4 Cl1 -177.41(15) . . . . ?
 C8 C3 C4 C5 -51.5(3) . . . . ?
 C2 N1 C3 C8 -146.7(2) . . . . ?
 C2 N1 C3 C4 90.4(3) . . . . ?
 C2 C1 C13 O2 31.3(4) . . . . ?
 C2 C1 C13 O1 -149.7(2) . . . . ?
 C9 C10 C11 C12 -0.7(4) . . . . ?
 C1 C2 C15 O3 -148.7(2) . . . . ?
 C1 C2 C15 O4 30.4(4) . . . . ?
 C4 C3 C8 C7 21.5(3) . . . . ?
 C4 C3 C8 C9 -160.01(19) . . . . ?
 C16 O3 C15 O4 6.9(4) . . . . ?
 C16 O3 C15 C2 -173.9(2) . . . . ?
 C15 C2 C1 N3 -177.4(2) . . . . ?
 C15 C2 C1 C13 7.7(4) . . . . ?
 C14 O1 C13 O2 2.3(4) . . . . ?
 C14 O1 C13 C1 -176.6(3) . . . . ?
 C11 C10 C9 C8 -0.4(4) . . . . ?
 C11 C12 C7 C6 -179.8(3) . . . . ?
 C11 C12 C7 C8 -1.2(4) . . . . ?
